# Supplementary material
Source: MDPI journal article supplement (https://www.mdpi.com/1424-2818/15/3/446)
Supplement: s1 [file s1]

**Table S1.** Basic information on studied reservoirs.

| Name | Forest division | Forestry       | Approximate area (m <sup>2</sup> ) |
|------|-----------------|----------------|------------------------------------|
| WEB1 | 227             | Czarny Bród    | 500                                |
| WEB2 | 78              | Żyliny         | 500                                |
| WEB3 | 132             | Żyliny         | 500                                |
| WEB4 | 189             | Sajenek        | 500                                |
| WEB5 | 168             | Czarny Bród    | 150                                |
| SEM1 | 75/76           | Żyliny         | 35                                 |
| SEM2 | 2               | Żyliny         | 30                                 |
| SEM3 | 249/250         | Czarny Bród    | 20                                 |
| SEM4 | 256             | Sajenek        | 10                                 |
| TRA1 | 75/76           | Żyliny         | 450                                |
| TRA2 | 2               | Żyliny         | 450                                |
| TRA3 | 249/250         | Czarny Bród    | 450                                |
| TRA4 | 256             | Sajenek        | 450                                |
| NAT1 | 112             | Brzozowe Grądy | <1000                              |
| NAT2 | 139             | Brzozowe Grądy | 25                                 |
| NAT3 | 161             | Żyliny         | 30                                 |
| NAT4 | 189             | Sajenek        | 10                                 |
| NAT5 | 158             | Czarny Bród    | 100                                |
| NAT6 | 176             | Kozi Rynek     | 30                                 |

Table S2. List of Odonata taxa recorded.

| Taxa                                                | Locality                       |      |      |      |                                 |       |       |       |      |                    |       |       |       |       |      |
|-----------------------------------------------------|--------------------------------|------|------|------|---------------------------------|-------|-------|-------|------|--------------------|-------|-------|-------|-------|------|
|                                                     | Reservoirs transformed in 2018 |      |      |      | Waterholes created in 2013-2015 |       |       |       |      | Natural reservoirs |       |       |       |       |      |
|                                                     | TRA1                           | TRA2 | TRA3 | TRA4 | WEB1                            | WE B2 | WE B3 | WE B4 | WEB5 | NA T1              | NA T2 | NA T3 | NA T4 | NA T5 | NAT6 |
| <i>Calopteryx splendens</i> (Harris, 1780)          |                                | ○    |      | ○    |                                 |       |       |       |      |                    |       |       |       |       |      |
| <i>Calopteryx virgo</i> (Linnaeus, 1758)            |                                | ○    |      |      |                                 |       |       |       |      |                    |       |       |       |       |      |
| <i>Lestes sponsa</i> (Hansemann, 1823)              | ○                              |      | ○    |      |                                 | ○     | ■     |       | ○    |                    |       |       |       |       |      |
| <i>Lestes dryas</i> Kirby, 1890                     | ○                              | ○    |      | ●    | ○                               |       | ○     |       | ●    |                    |       |       |       | ○     |      |
| <i>Lestes barbarus</i> (Fabricius, 1798)            |                                |      |      |      |                                 |       |       |       | ○    |                    |       |       |       |       |      |
| <i>Lestes virens</i> (Charpentier, 1825)            | ○                              | ○    | ○    | ○    |                                 | ■     | ○     |       |      |                    |       |       |       |       |      |
| <i>Ischnura elegans</i> (Vander Linden, 1820)       |                                |      |      |      | ●                               |       |       |       | ●    |                    |       |       | ○     |       |      |
| <i>Ischnura pumilio</i> (Charpentier, 1825)         |                                |      |      |      |                                 | ○     | ○     |       |      |                    |       |       |       |       |      |
| <i>Enallagma cyathigerum</i> (Charpentier, 1840)    | ○                              |      |      |      |                                 |       | ○     |       | ○    |                    |       |       |       |       |      |
| <i>Coenagrion puella</i> (Linnaeus, 1758)           | ●                              | ●    | ●    | ●    | ●                               | ●     | ●     | ●     | ●    | ●                  |       | ■     | ○     | ●     | ●    |
| <i>Coenagrion hastulatum</i> (Charpentier, 1825)    |                                | ●    |      |      |                                 |       |       | ○     |      |                    |       |       |       | ○     |      |
| <i>Coenagrion lunulatum</i> (Charpentier, 1840)     |                                | ●*   |      |      |                                 |       |       |       |      |                    |       |       |       |       |      |
| <i>Pyrrhosoma nymphula</i> (Sulzer, 1776)           |                                |      | ■    |      | ○                               |       |       |       |      |                    |       |       |       | ●     |      |
| <i>Aeshna isoeles</i> (Müller, 1767)                |                                |      |      | ○    |                                 |       |       |       |      |                    |       |       |       |       |      |
| <i>Aeshna grandis</i> (Linnaeus, 1758)              |                                |      |      |      |                                 |       |       |       |      |                    |       |       |       | ●     |      |
| <i>Aeshna cyanea</i> (Müller, 1764)                 | ■                              | ○    | ■    | ●    |                                 |       |       |       | ■    | ●                  |       | ■     |       | ●     | ■    |
| Aeshnidae                                           |                                |      |      |      | ○                               |       |       |       |      |                    |       |       |       |       |      |
| <i>Gomphus vulgatissimus</i> (Linnaeus, 1758)       |                                | ○    |      |      |                                 |       |       |       |      |                    |       |       |       | ○     |      |
| <i>Cordulia aenea</i> (Linnaeus, 1758)              |                                |      | ○    |      | ○                               |       |       |       |      |                    |       |       |       |       |      |
| <i>Somatochlora metallica</i> (Vander Linden, 1825) |                                |      |      |      |                                 |       |       |       | ○    |                    |       |       |       |       |      |
| Corduliidae                                         |                                |      |      |      |                                 | ○     |       |       |      |                    |       |       |       |       |      |
| <i>Libellula quadrimaculata</i> Linnaeus, 1758      | ●                              | ○    | ■    | ●    |                                 | ●     | ■     | ●     | ○    |                    |       |       |       | ○     |      |
| <i>Libellula depressa</i> Linnaeus, 1758            | ●                              | ■    | ●    | ●    |                                 |       | ○     |       | ○    |                    |       |       |       |       |      |
| <i>Leucorrhinia pectoralis</i> (Charpentier, 1825)  | ■                              | ○    | ●    | ●    | ○                               | ■     |       |       |      |                    |       |       |       | ■     | ○    |
| <i>Sympetrum danae</i> (Sulzer, 1776)               | ○                              | ○    |      |      |                                 |       |       |       |      |                    |       |       |       |       |      |
| <i>Sympetrum sanguineum</i> (Müller, 1764)          | ■                              |      | ○    |      |                                 | ■     | ○     |       | ■    |                    |       |       |       |       |      |

\* 1 *exuviae* was found. Reliably distinguishing the *exuviae* of *Coenagrion lunulatum* from the *exuviae* of the *C. hastulatum* and *C. armatum* is difficult. The record should be regarded as uncertain. ● autochthonous; ■ probably autochthonous; ○ recorded.

Table S3. List of Amphibians taxa recorded in 2018 and in 2020.

| Taxa                                                  | Locality                 |      |      |      |      |      |      |      |      |      |           |      |                     |      |           |      |           |      |      |      |               |      |      |      |      |      |      |      |      |      |  |
|-------------------------------------------------------|--------------------------|------|------|------|------|------|------|------|------|------|-----------|------|---------------------|------|-----------|------|-----------|------|------|------|---------------|------|------|------|------|------|------|------|------|------|--|
|                                                       | Ponds built in 2013-2015 |      |      |      |      |      |      |      |      |      |           |      | Ponds built in 2018 |      |           |      |           |      |      |      | Natural ponds |      |      |      |      |      |      |      |      |      |  |
|                                                       | WEB1                     |      | WEB2 |      | WEB3 |      | WEB4 |      | WEB5 |      | SEM/ TRA1 |      | SEM/ TRA2           |      | SEM/ TRA3 |      | SEM/ TRA4 |      | NAT1 |      | NAT2          |      | NAT3 |      | NAT4 |      | NAT5 |      | NAT6 |      |  |
|                                                       | 2018                     | 2020 | 2018 | 2020 | 2018 | 2020 | 2018 | 2020 | 2018 | 2020 | 2018      | 2020 | 2018                | 2020 | 2018      | 2020 | 2018      | 2020 | 2018 | 2020 | 2018          | 2020 | 2018 | 2020 | 2018 | 2020 | 2018 | 2020 | 2018 | 2020 |  |
| <i>Bufo bufo</i><br>(Linnaeus, 1758)                  |                          |      | ●■   |      | ●■   |      |      |      |      | ●■   |           |      |                     |      |           |      |           |      | ●■   |      |               |      |      |      |      |      |      |      |      |      |  |
| <i>Hyla arborea</i><br>(Linnaeus, 1758)               |                          |      |      |      |      |      |      |      |      |      |           |      |                     |      |           |      |           |      | ○    |      |               |      |      |      |      |      |      |      |      |      |  |
| <i>Lissotriton vulgaris</i><br>(Linnaeus, 1758)       | ●■                       |      | ●■   |      |      |      | ●    |      | ●    |      | ●■        |      |                     | ●■   | ●■        | ●■   | ●         |      |      |      |               |      |      |      | ●■   | ●■   |      |      |      |      |  |
| <i>Pelophylax esculentus</i><br>(Linnaeus, 1758)<br>* |                          |      |      |      |      |      |      |      |      |      |           |      |                     |      |           |      |           |      |      |      |               |      |      |      |      |      |      |      |      |      |  |
| <i>Pelophylax lessonae</i><br>(Camerano, 1882)<br>*   | ●■                       | ●■   | ●■   | ●■   | ●■   | ●■   | ●■   | ●■   |      | ●■   | ●■        | ●    | ●                   | ●    | ●         | ●    | ●         | ●■   | ●    | ●■   |               | ●    |      | ●    | ●    | ●    |      |      |      |      |  |
| <i>Pelophylax ridibundus</i><br>(Pallas, 1771) *      |                          |      |      |      |      |      |      |      |      |      |           |      |                     |      |           |      |           |      |      |      |               |      |      |      |      |      |      |      |      |      |  |
| <i>Pseudepidalea viridis</i> (Laurenti, 1768)         |                          |      |      |      |      |      | ●■   | ●■   |      |      |           |      |                     |      |           |      |           |      |      |      |               |      |      |      |      |      |      |      |      |      |  |
| <i>Rana arvalis</i><br>(Nilsson, 1842)                | ●■                       |      | ●■   |      | ●■   |      |      |      | ●■   |      |           |      |                     |      | ●         |      |           | ●■   |      |      |               |      |      |      |      |      | ●■   |      |      |      |  |
| <i>Rana temporaria</i><br>(Linnaeus, 1758)            |                          |      |      |      |      |      |      |      |      |      |           |      |                     |      |           |      |           |      |      |      |               |      |      |      |      |      |      |      |      |      |  |
| <i>Triturus cristatus</i><br>(Laurenti, 1768)         | ●■                       |      | ●■   | ●■   | ●■   | ●    |      |      |      |      |           | ●    | ●■                  | ●    | ●         |      | ●■        |      | ●■   |      |               |      |      |      | ●■   | ●    |      |      |      |      |  |

\* Due to the difficulty of determining the taxonomic affiliation of green frogs in the field, each individual encountered was described as belonging to the group of "green frogs" (*Pelophylax esculentus* complex). ● adult; ■ eggs/larvae/tadpole; ○ only call recorded.

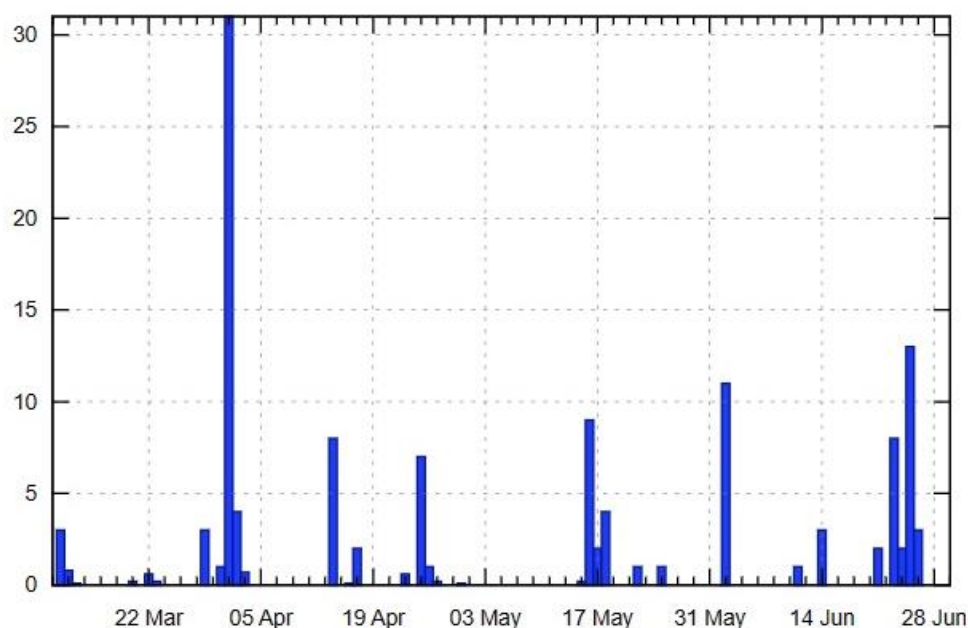

Figure S1. The chart of precipitation in Suwalki, 10.03.2018-30.06.2018 [74].

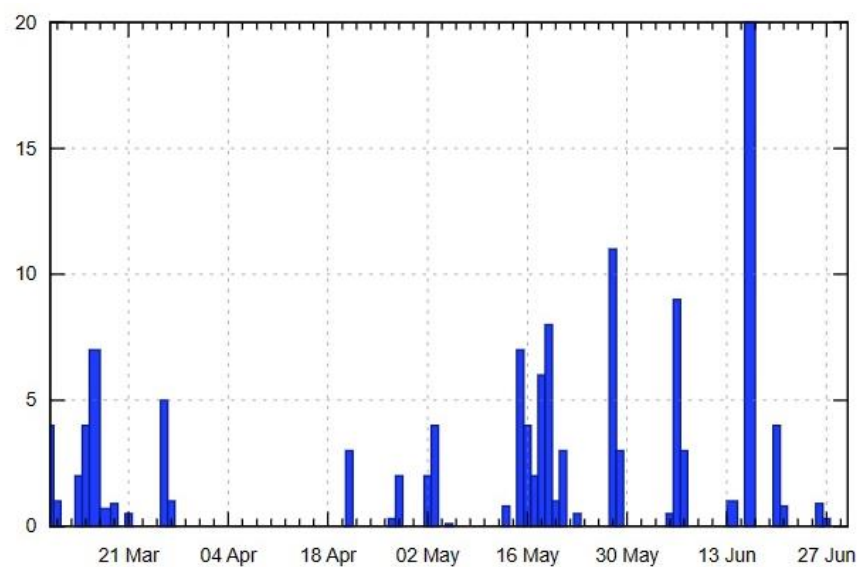

**Figure S2.** The chart of precipitation in Suwalki, 10.03.2019-30.06.2019 [74].

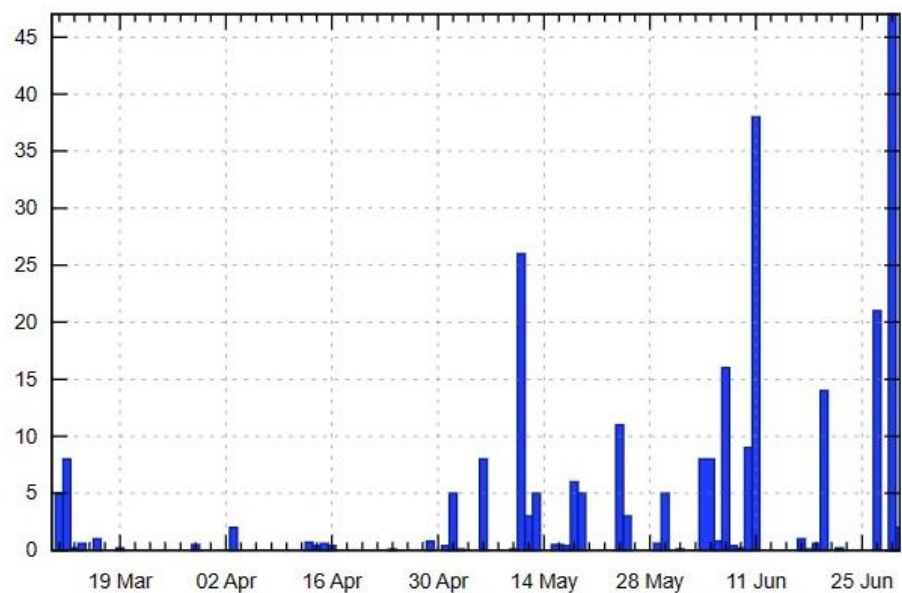

**Figure S3.** The chart of precipitation in Suwalki, 10.03.2020-30.06.2020 [74]

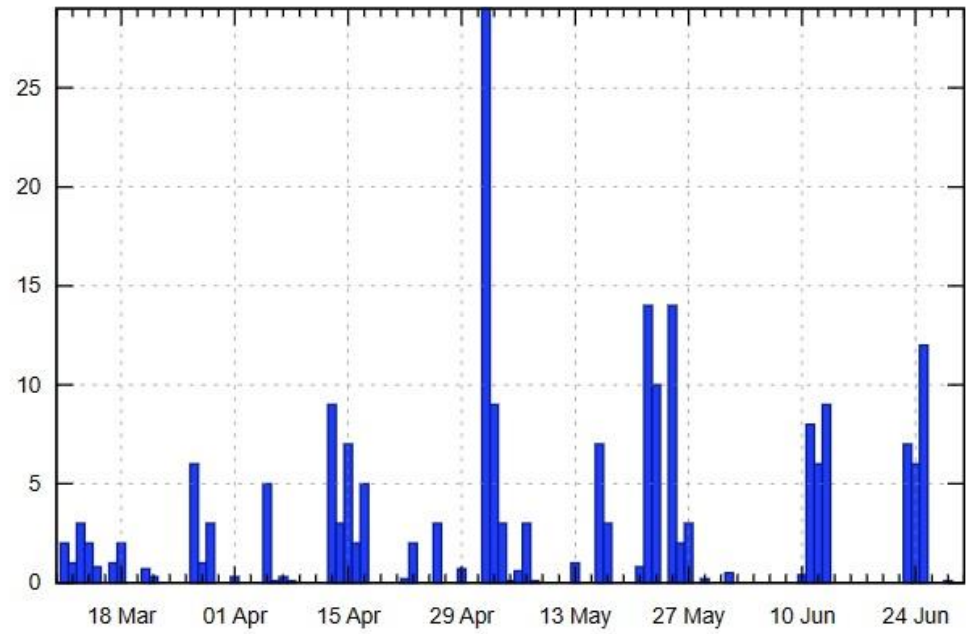

**Figure S4.** The chart of precipitation in Suwalki, 10.03.2020-30.06.2021 [74].

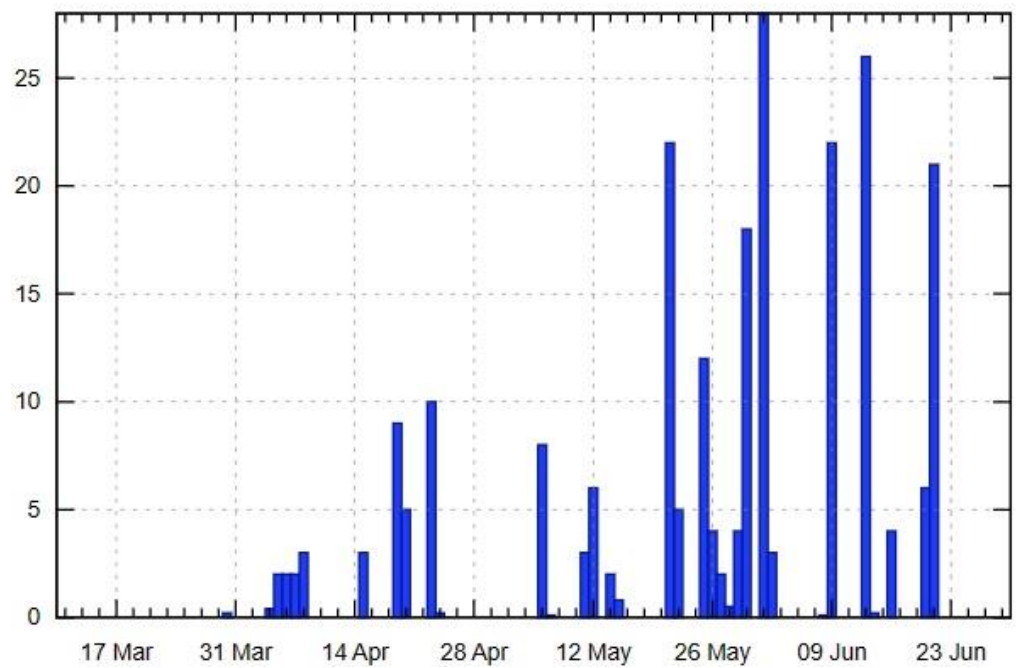

**Figure S5.** The chart of precipitation in Suwalki, 10.03.2022-30.06.2022 [74].

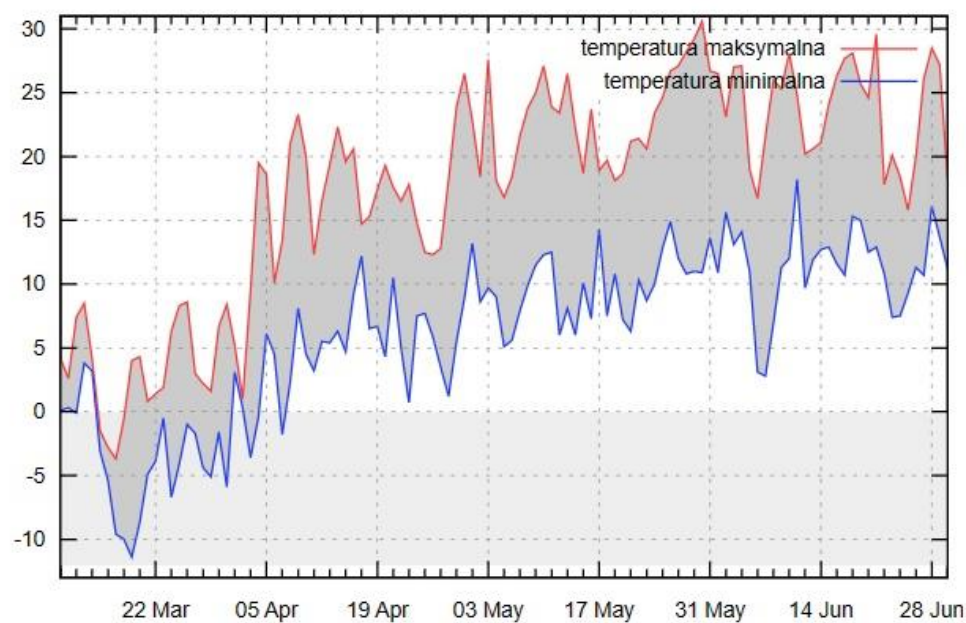

**Figure S6.** The chart of minimum and maximum temperature in Suwalki, 10.03.2022-30.06.2018 [74].

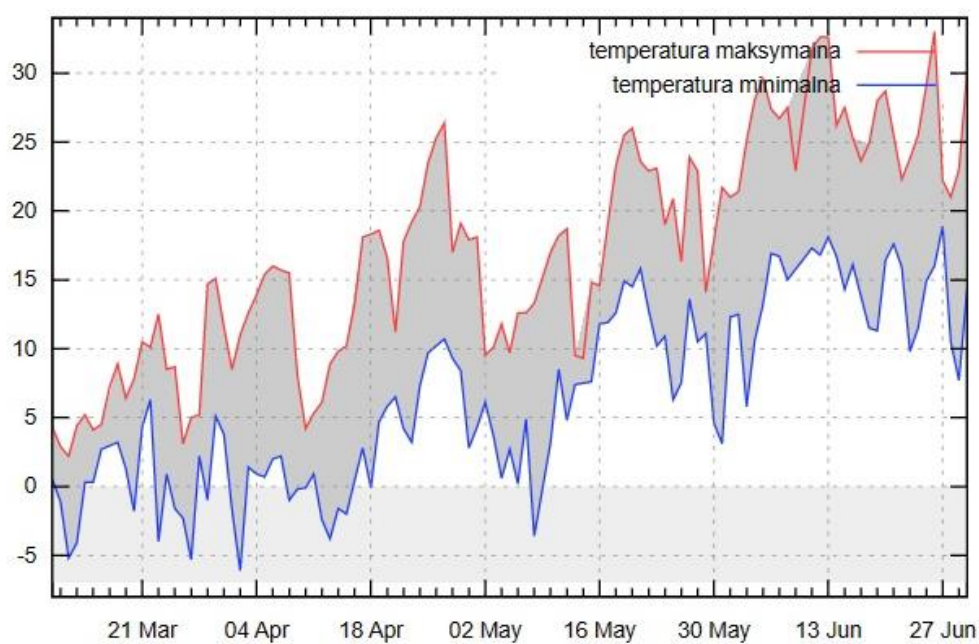

**Figure S7.** The chart of minimum and maximum temperature in Suwalki, 10.03.2022-30.06.2019 [74].

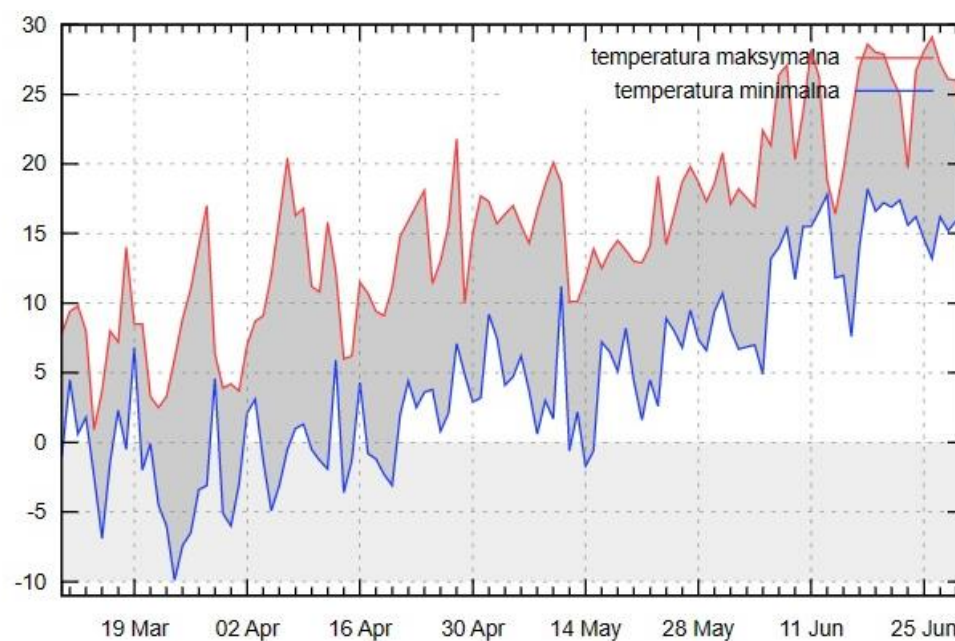

**Figure S8.** The chart of minimum and maximum temperature in Suwalki, 10.03.2020-30.06.2020 [74].

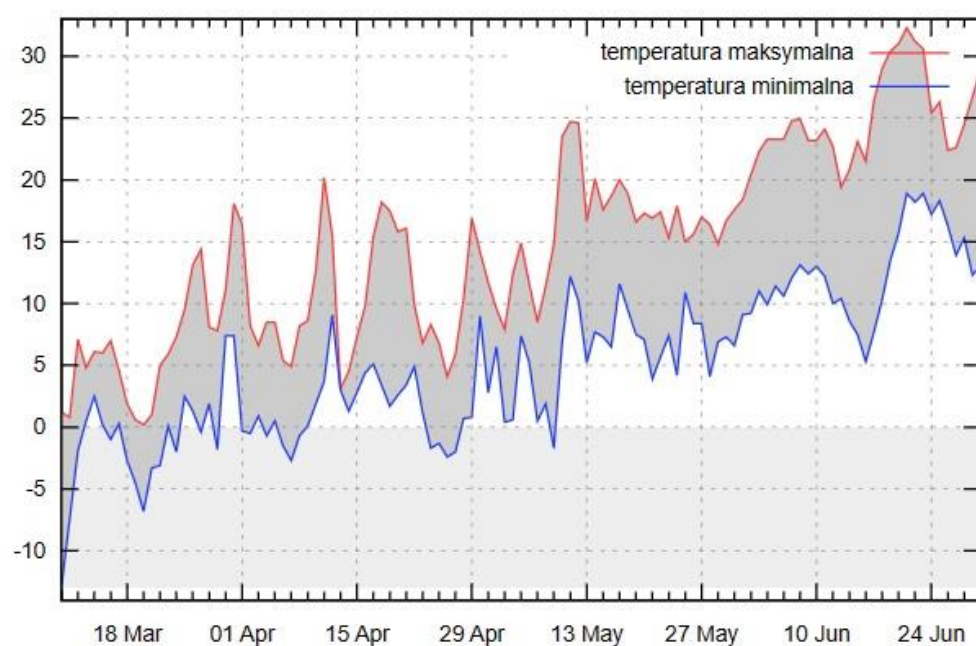

**Figure S9.** The chart of minimum and maximum temperature in Suwalki, 10.03.2021-30.06.2021 [74].



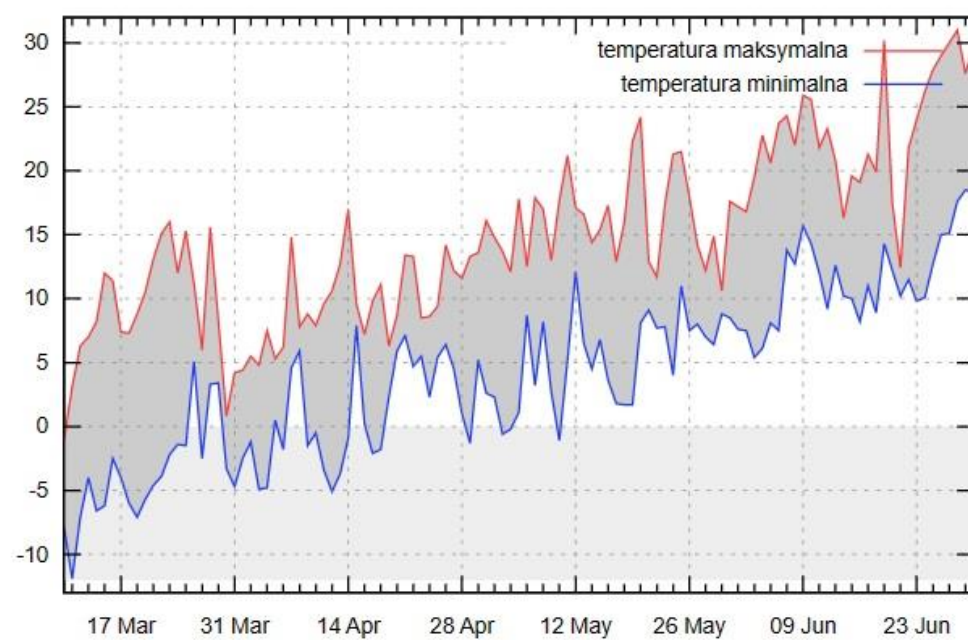

**Figure S10.** The chart of minimum and maximum temperature in Suwalki, 10.03.2022-30.06.2022 [74].
